# Supplementary material for: A framework for the development and implementation of open trauma guidelines: A Delphi consensus validation
Source: Research Square preprint supplement (doi:10.21203/rs.3.rs-6378469/v1), 2025-04-08
Supplement: Supplementary file 1 [file 79861d4f3fd78bd39d4150e6.docx]

Appendix 1: Delphi study participants

Participating panel of orthopaedic and plastic surgeons for Delphi study: Alina Ortega-Briones, Ata Ul Haq, Álvaro Zamorano, Beatríz Olías López, Carlos Fonfach, Chad Chang, Carlos Prada, Diana Crego-Vita, Ernesto Ewertz, Anton Fries, Gonzalo Aranda, Yung-Chen Chiu, Oriana Haran, Hari Castro, Héctor Aguado, Javier Martínez Ros, Juan de Dios Errázuriz, Joaquín Palma, Leonardo Parada, Lily Mundy, Antonella López, Luigi Troisi, Macarena Vizcay, Mania Mani, Roberto Martínez, Fernando Nangole, Nicolás Pinto, Pierlugi Tos, Asimb Bashir, Patrick Will, Quillan Young Sing, Raquel García Albea, Sarah Lonie, Richard Thomson, José Valle Cruz, Vicente Guimera, Virginia García Virto, Aleksandra Winiarska.
